# Supplementary material
Source: Springer Nature journal article supplement (https://www.springermedizin.de/resource/supplementary/12905_2010_220_MOESM2_ESM.pdf/9518330)
Supplement: MOESM2 [file 9518330]

## Obstetric studies

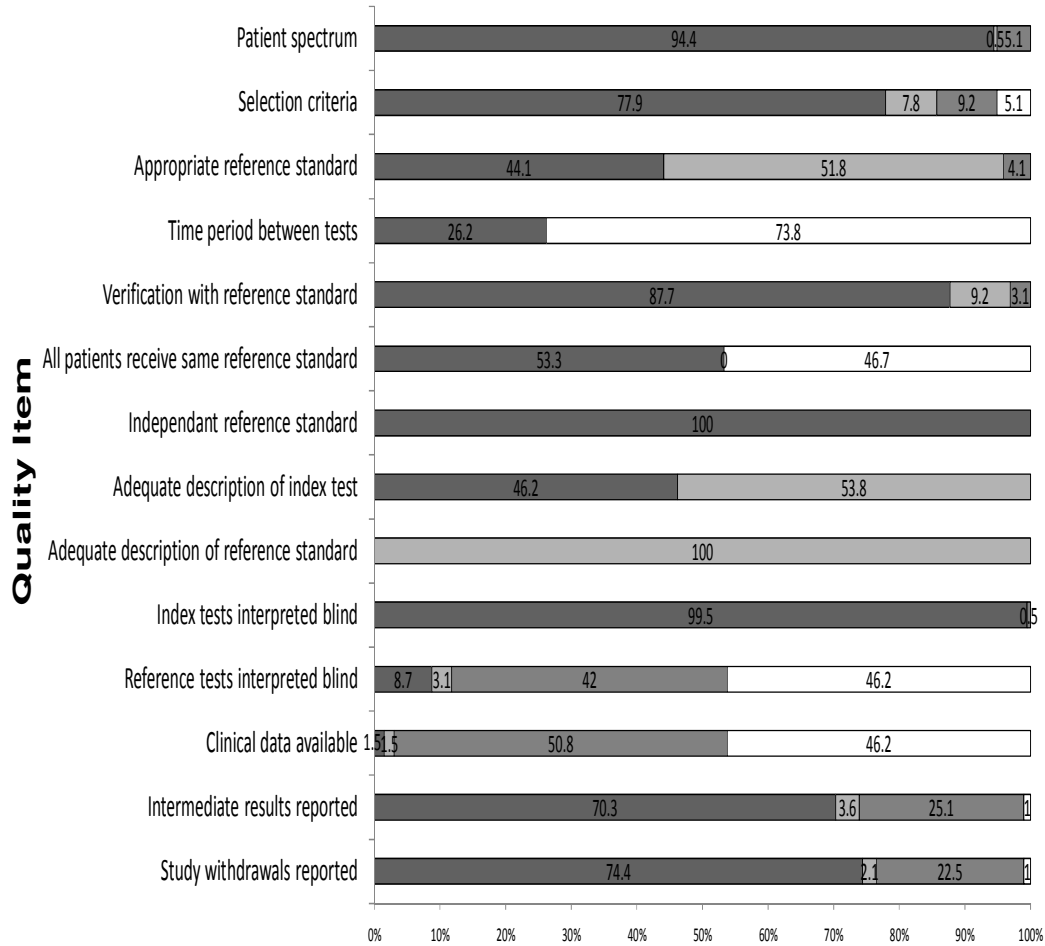

## Gynaecology studies

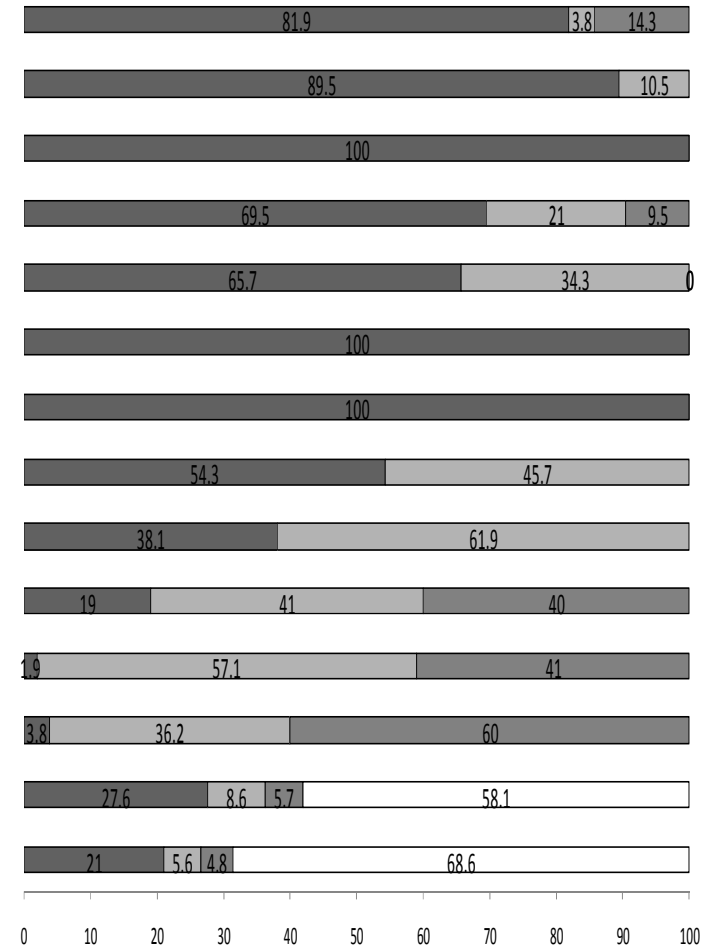

Percentage compliance with quality item

Compliant
  Not compliant
  Unclear
  Not applicable
